# Supplementary material
Source: publisher figshare collection journal article supplement (https://tandf.figshare.com/ndownloader/files/1829407)
Supplement: Supplementary file 1 [file 1829407]

**Supplemental Table 1**: HPLC-UV conditions for aldehydes analysis.

| Instrument: | Agilent 1200 HPLC, diode array detector | |
| --- | --- | --- |
| Column: | Kromasil 100-5C18 4.6mm x 250mm column | |
| Mobile Phase: | A: Water | |
|  | B: Acetonitrile | |
| Column Temp: | 25oC | |
| Flow rate: | 1.0 mL/min | |
| Injection Volume: | 10µL | |
| Detection: | 360 nm | |
| Gradient: | Time (min) | Acetonitrile (%) |
|  | 0 | 60 |
|  | 7 | 60 |
|  | 20 | 100 |

**Supplemental Table 2**: GC-MS conditions for charcoal tube analysis.

| Instrument: | Agilent GC/MS, GC/FID 6890/5973 |
| --- | --- |
| Column Identification: | DB-5MS, 0.25mm ID x 30m x 0.25µm |
| Injector Temperature: | 250oC |
| Source Temperature: | 250oC |
| Temperature Program: | 40oC (hold for 3 min) |
|  | 10oC/min to 280oC |
|  | 280oC (hold for 3 min) |
| Split Injection: | 10:1 ratio, 12 mL/min |
| Injection Volume: | 1µL |
| Scan Range: | 35-350 amu |
| Carrier Gas: | Helium |
| Run Time: | 30 min |


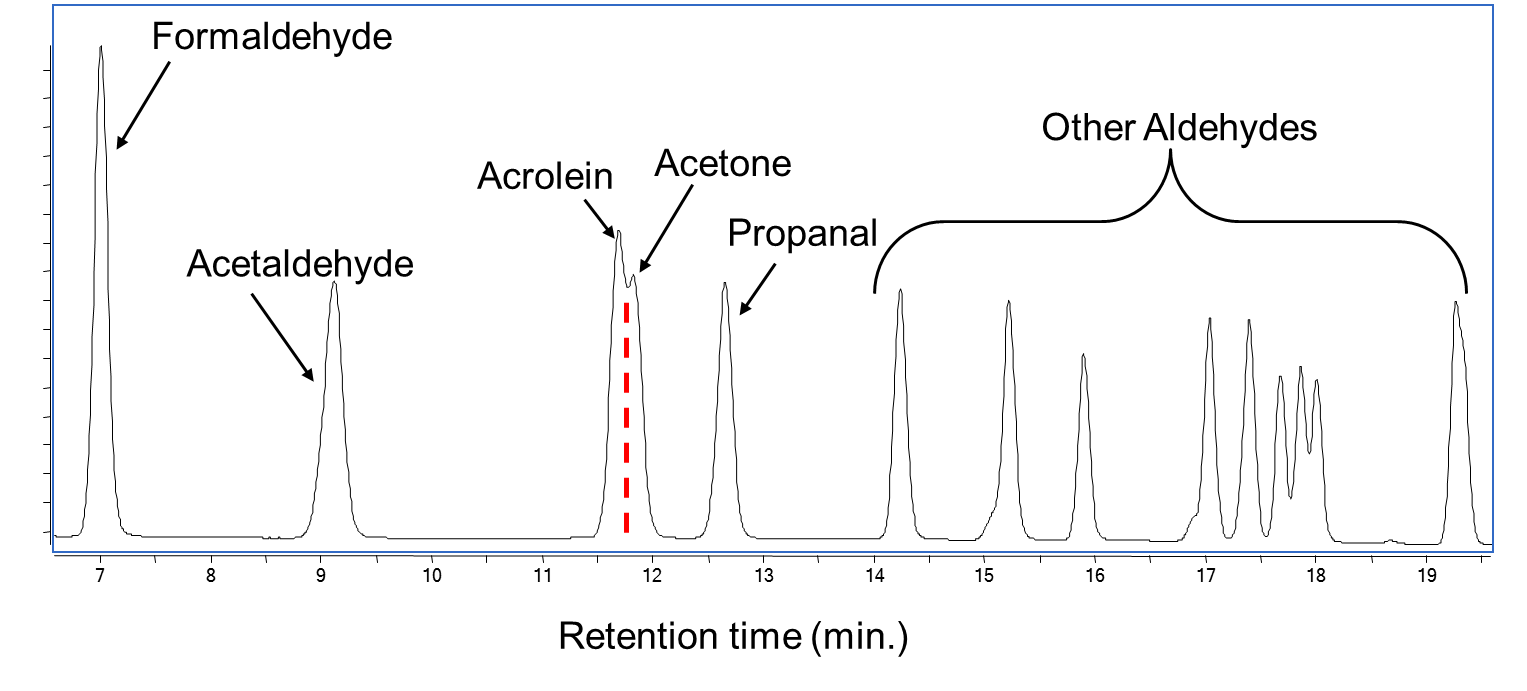


**Supplemental Figure 1**: Representative HPLC-UV chromatogram for analysis of aldehyde standard solution.
